# Supplementary material for: Osteopathic manipulative treatment for nonspecific low back pain: a systematic review and meta-analysis
Source: PubMed Central journal article supplement (PMC4159549; doi:10.1186/1471-2474-15-286), 2014-08-30

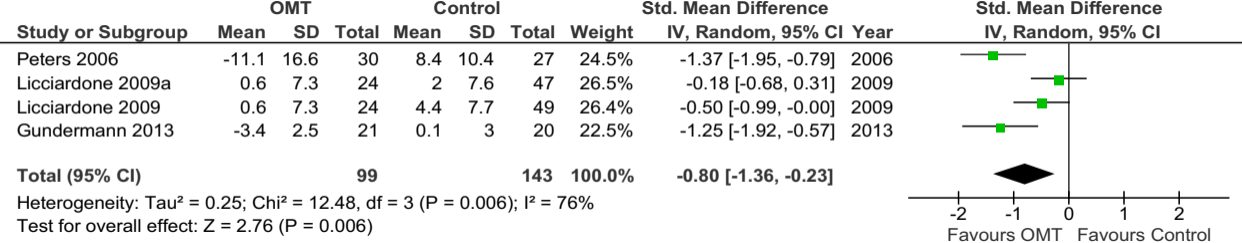

Supplement: 12891_2014_2231_MOESM7_ESM.pdf [file 12891_2014_2231_MOESM7_ESM.pdf]
